# Supplementary material for: Hexanoic, Octanoic and Decanoic Acids Promote Basal and Insulin-Induced Phosphorylation of the Akt-mTOR Axis and a Balanced Lipid Metabolism in the HepG2 Hepatoma Cell Line
Source: MDPI journal article supplement (doi:10.3390/molecules23092315), 2018-09-11
Supplement: s1 [file s1]

Supplementary material

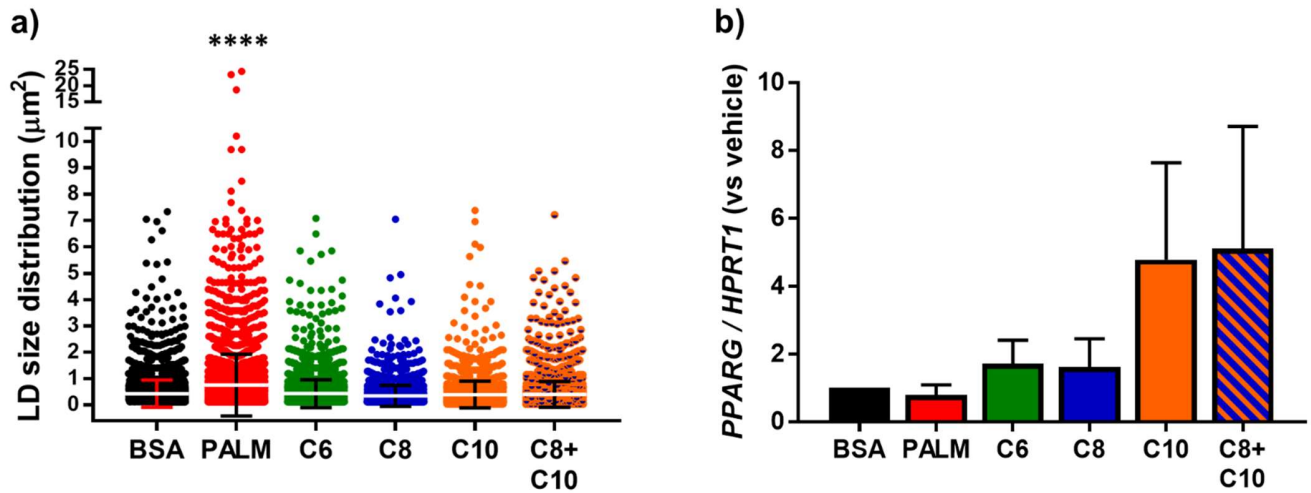

Supplementary figure 1. Lipid droplet size distribution and PPARG expression in MCFA-treated HepG2 cells.

a) Once treated with fatty acids, HepG2 cells were processed for lipid droplet (LD) staining, imaging and analysis as described in section 2.6 of the article. Data are presented as mean  $\pm$  standard deviation. A one-tailed unpaired Student's t-test was used to evaluate statistical significance. A p-value  $< 0.05$  was considered statistically significant (n = 4 independent replicates). \*\*\*\*, p-value  $\leq 0.0001$ .

b) Gene expression of *PPARG* have been evaluated following the procedure described in section 2.8 of the article, using primers *PPARG\_Fwd* (TCTCTCCGTAATGGAAGACG) and *PPARG\_rev* (GCATTATGAGACATCCCCAC). Data are presented as mean  $\pm$  standard error of the mean (SEM). A "one sample" t-test was used to evaluate statistical significance. A p-value  $< 0.05$  was considered statistically significant (n = 3 independent replicates).
